# Supplementary material for: POWERDRESS-mediated histone deacetylation is essential for thermomorphogenesis in Arabidopsis thaliana
Source: PLoS Genet. 2018 Mar 16;14(3):e1007280. doi: 10.1371/journal.pgen.1007280 (PMC5874081; doi:10.1371/journal.pgen.1007280)
Supplement: S3 Table — (XLSX) [file pgen.1007280.s021.xlsx]

## Sheet: New_Col_23_2hrs_vs_27_2hrs
Table S3: Differentially expressed genes (DEGs) between 23ºC and 27ºC in Col-0
Gene ID	Description	Up/Down at 27 ºC	MNC_Col_23_2hrs	MNC_Col_27_2hrs	baseMean	log2FoldChange	lfcSE	stat	pvalue	padj
AT5G54060	Encodes a anthocyanin 3-O-glucoside: 2"-O-xylosyl-transferase involved in anthocyanin modification that converts cyanidin 3-O-glucoside to cyanidin 3-O-xylosyl(1->2)glucoside. Its preferred sugar donor is UDP-xylose.	Down	1198.31	98.0526	648.18	-2.1947	0.328768	-6.67553	2.46337e-11	4.06801e-07
AT4G09820	TT8 is a regulation factor that acts in a concerted action with TT1, PAP1 and TTG1 on the regulation of flavonoid pathways, namely proanthocyanidin and anthocyanin biosynthesis. Affects dihydroflavonol 4-reductase gene expression. It is thought that a ternary complex composed of TT2, TT8 and TTG1 is necessary for correct expression of BAN in seed endothelium. Also important for important for marg…	Down	406.344	8.23092	207.288	-2.08201	0.347706	-5.98786	2.1262e-09	1.75561e-05
AT1G66700	A member of the Arabidopsis SABATH methyltransferase gene family. Encodes PXMT1, a methyltransferase that methylates 1,7-paraxanthine.	Down	626.384	17.3831	321.883	-1.97477	0.347619	-5.68084	1.34035e-08	3.6891e-05
AT4G22880	encodes leucoanthocyanidin dioxygenase, which is involved in proanthocyanin biosynthesis. Mutant analysis suggests that this gene is also involved in vacuole formation.	Down	2292.07	153.887	1222.98	-1.93977	0.335114	-5.78838	7.10687e-09	2.93407e-05
AT2G29350	senescence-associated gene SAG13 encoding a short-chain alcohol dehydrogenase	Down	414.555	15.6009	215.078	-1.82774	0.347802	-5.25512	1.47928e-07	0.000183597
AT5G44120	Encodes a 12S seed storage protein. The Landsberg erecta genome contains another copy of 12S globulin gene, CRA2, which is located tandemly with CRA1. Protein is tyrosine-phosphorylated and its phosphorylation state is modulated in response to ABA in Arabidopsis thaliana seeds.	Down	2425.54	527.341	1476.44	-1.70588	0.319505	-5.33912	9.33966e-08	0.000128529
AT1G56650	Encodes a putative MYB domain containing transcription factor involved in anthocyanin metabolism and radical scavenging. Essential for the sucrose-mediated expression of the dihydroflavonol reductase gene. Auxin and ethylene responsiveness of PAP1 transcription is lost in myb12 mutants.	Down	1123.1	141.148	632.122	-1.69778	0.323648	-5.24575	1.55647e-07	0.000183597
AT4G28520	Encodes a 12S seed storage protein that is tyrosine-phosphorylated and its phosphorylation state is modulated in response to ABA in Arabidopsis thaliana seeds.	Down	1763.19	377.488	1070.34	-1.6309	0.300969	-5.41882	5.99932e-08	9.00662e-05
AT1G26410	FAD-binding Berberine family protein; FUNCTIONS IN: electron carrier activity, oxidoreductase activity, FAD binding, catalytic activity; LOCATED IN: cellular_component unknown; CONTAINS InterPro DOMAIN/s: FAD-binding, type 2 (InterPro:IPR016166), Berberine/berberine-like (InterPro:IPR012951), FAD linked oxidase, N-terminal (InterPro:IPR006094); BEST Arabidopsis thaliana protein match is: FAD-bind…	Down	136.823	2.30312	69.5631	-1.61827	0.341779	-4.73485	2.19213e-06	0.00172385
AT5G17220	Encodes glutathione transferase belonging to the phi class of GSTs. Naming convention according to Wagner et al. (2002). Mutants display no pigments on leaves and stems. Likely to function as a carrier to transport anthocyanin from the cytosol to tonoplasts.	Down	1328.6	131.733	730.167	-1.59095	0.332738	-4.7814	1.74082e-06	0.0014374
AT2G41190	Transmembrane amino acid transporter family protein; FUNCTIONS IN: amino acid transmembrane transporter activity; INVOLVED IN: amino acid transport; LOCATED IN: plasma membrane, membrane; EXPRESSED IN: 24 plant structures; EXPRESSED DURING: 13 growth stages; CONTAINS InterPro DOMAIN/s: Amino acid transporter, transmembrane (InterPro:IPR013057); BEST Arabidopsis thaliana protein match is: Transmem…	Down	1253.27	150.608	701.94	-1.5907	0.325802	-4.88239	1.04805e-06	0.000910924
AT3G29590	At3g29590 (At5MAT) encodes a malonyl-CoA:anthocyanidin 5-O-glucoside-6"-O-malonyltransferase that is coordinately expressed with a epistatic 5-O-anthocyanidin glucosyltransferase (At4g14090). The enzyme is involved in the malonylation of anthocyanins in Arabidopsis.	Down	623.683	53.5914	338.637	-1.57628	0.343954	-4.58282	4.58754e-06	0.00344357
AT5G52310	cold regulated gene, the 5' region of cor78 has cis-acting regulatory elements that can impart cold-regulated gene expression	Down	6926.07	1246.24	4086.16	-1.53937	0.302184	-5.09415	3.50308e-07	0.000361562
AT1G18870	Encodes a protein with isochorismate synthase activity involved in phylloquinone biosynthesis. Mutant studies of this gene's function suggest that its function is redundant with that of ICS1 (AT1G7410).	Down	921.741	172.745	547.243	-1.53538	0.310043	-4.95216	7.3394e-07	0.000712958
AT4G12490	Bifunctional inhibitor/lipid-transfer protein/seed storage 2S albumin superfamily protein; CONTAINS InterPro DOMAIN/s: Bifunctional inhibitor/plant lipid transfer protein/seed storage (InterPro:IPR016140), Plant lipid transfer protein/seed storage/trypsin-alpha amylase inhibitor (InterPro:IPR003612), Plant lipid transfer protein/hydrophobic protein, helical domain (InterPro:IPR013770); BEST Arabi…	Down	214.327	40.5898	127.458	-1.50326	0.340904	-4.40961	1.03557e-05	0.00684055
AT2G21590	Encodes the large subunit of ADP-glucose pyrophosphorylase, the enzyme which catalyzes the first and limiting step in starch biosynthesis. The large subunit plays a regulatory role whereas the small subunit (ApS) is the catalytic isoform. Four isoforms of the large subunit (ApL1-4) have been described.	Down	1062.51	108.554	585.532	-1.49601	0.336019	-4.45217	8.50078e-06	0.00610356
AT1G32350	alternative oxidase 1D (AOX1D); FUNCTIONS IN: alternative oxidase activity; INVOLVED IN: oxidation reduction, response to cyclopentenone; LOCATED IN: mitochondrial envelope, mitochondrion; EXPRESSED IN: stem, sepal, leaf, stamen; EXPRESSED DURING: LP.04 four leaves visible, 4 anthesis, petal differentiation and expansion stage; CONTAINS InterPro DOMAIN/s: Alternative oxidase (InterPro:IPR002680);…	Down	115.565	2.76374	59.1644	-1.35694	0.335482	-4.04476	5.23761e-05	0.0308907
AT5G59320	Predicted to encode a PR (pathogenesis-related) protein. Belongs to the lipid transfer protein (PR-14) family with the following members: At2g38540/LTP1, At2g38530/LTP2, At5g59320/LTP3, At5g59310/LTP4, At3g51600/LTP5, At3g08770/LTP6, At2g15050/LTP7, At2g18370/LTP8, At2g15325/LTP9, At5g01870/LTP10, At4g33355/LTP11, At3g51590/LTP12, At5g44265/LTP13, At5g62065/LTP14, At4g08530/LTP15.	Down	4013.17	587.615	2300.39	-1.2948	0.32594	-3.97252	7.11148e-05	0.0391463
AT3G57520	SIP2 encodes a raffinose-specific alpha-galactosidase that catalyzes the breakdown of raffinose into alpha-galatose and sucrose. This enzyme may function in unloading raffinose from the phloem as part of sink metabolism. Although it was originally predicted to act as a raffinose synthase (RS), that activity was not observed for recombinant SIP2.	Down	3651.77	1441.61	2546.69	-1.11521	0.278357	-4.00639	6.16541e-05	0.0351088
AT5G65730	xyloglucan endotransglucosylase/hydrolase 6 (XTH6); FUNCTIONS IN: hydrolase activity, acting on glycosyl bonds, hydrolase activity, hydrolyzing O-glycosyl compounds, xyloglucan:xyloglucosyl transferase activity; INVOLVED IN: response to water deprivation; LOCATED IN: endomembrane system, cell wall, apoplast; EXPRESSED IN: 21 plant structures; EXPRESSED DURING: 14 growth stages; CONTAINS InterPro …	Up	453.197	1346.92	900.059	1.3709	0.309443	4.4302	9.41445e-06	0.00647792
AT5G12030	Encodes a cytosolic small heat shock protein with chaperone activity that is induced by heat and osmotic stress and is also expressed late in seed development.	Up	27.8006	169.576	98.6881	1.4228	0.345573	4.11721	3.83487e-05	0.0234552
AT5G12020	17.6 kDa class II heat shock protein (HSP17.6II); CONTAINS InterPro DOMAIN/s: Heat shock protein Hsp20 (InterPro:IPR002068), HSP20-like chaperone (InterPro:IPR008978); BEST Arabidopsis thaliana protein match is: heat shock protein 17.6A (TAIR:AT5G12030.1); Has 1807 Blast hits to 1807 proteins in 277 species: Archae - 0; Bacteria - 0; Metazoa - 736; Fungi - 347; Plants - 385; Viruses - 0; Other Eu…	Up	10.4878	105.527	58.0074	1.46024	0.347943	4.19677	2.70752e-05	0.0171969
AT5G12110	Glutathione S-transferase, C-terminal-like;Translation elongation factor EF1B/ribosomal protein S6; FUNCTIONS IN: translation elongation factor activity; INVOLVED IN: translational elongation; LOCATED IN: eukaryotic translation elongation factor 1 complex; EXPRESSED IN: 18 plant structures; EXPRESSED DURING: 12 growth stages; CONTAINS InterPro DOMAIN/s: Translation elongation factor EF1B/ribosoma…	Up	209.252	830.145	519.699	1.47032	0.300194	4.89788	9.68766e-07	0.000888789
AT5G52640	Encodes a cytosolic heat shock protein AtHSP90.1. AtHSP90.1 interacts with disease resistance signaling components SGT1b and RAR1 and is required for RPS2-mediated resistance.	Up	466.912	1907.1	1187.01	1.6674	0.290935	5.73119	9.973e-09	3.29388e-05
AT3G46230	member of the class I small heat-shock protein (sHSP) family, which accounts for the majority of sHSPs in maturing seeds	Up	26.0943	217.393	121.744	1.77462	0.3421	5.18743	2.13211e-07	0.000234731
AT5G48570	Encodes one of the 36 carboxylate clamp (CC)-tetratricopeptide repeat (TPR) proteins (Prasad 2010, Pubmed ID: 20856808) with potential to interact with Hsp90/Hsp70 as co-chaperones.	Up	226.507	1736.94	981.726	1.77836	0.321173	5.53707	3.07567e-08	5.64352e-05
AT4G12400	Encodes one of the 36 carboxylate clamp (CC)-tetratricopeptide repeat (TPR) proteins (Prasad 2010, Pubmed ID: 20856808) with potential to interact with Hsp90/Hsp70 as co-chaperones.	Up	149.47	784.944	467.207	1.80059	0.309361	5.82035	5.87236e-09	2.93407e-05
AT5G51440	HSP20-like chaperones superfamily protein; CONTAINS InterPro DOMAIN/s: Heat shock protein Hsp20 (InterPro:IPR002068), HSP20-like chaperone (InterPro:IPR008978); BEST Arabidopsis thaliana protein match is: mitochondrion-localized small heat shock protein 23.6 (TAIR:AT4G25200.1); Has 3995 Blast hits to 3995 proteins in 1037 species: Archae - 138; Bacteria - 2214; Metazoa - 5; Fungi - 114; Plants - …	Up	76.7945	442.376	259.585	1.80264	0.321112	5.61376	1.97978e-08	4.67057e-05
AT2G29500	HSP20-like chaperones superfamily protein; CONTAINS InterPro DOMAIN/s: Heat shock protein Hsp20 (InterPro:IPR002068), HSP20-like chaperone (InterPro:IPR008978); BEST Arabidopsis thaliana protein match is: HSP20-like chaperones superfamily protein (TAIR:AT1G07400.1); Has 6873 Blast hits to 6873 proteins in 1575 species: Archae - 184; Bacteria - 4083; Metazoa - 80; Fungi - 309; Plants - 1622; Virus…	Up	66.704	611.808	339.256	1.80447	0.330496	5.45988	4.76463e-08	7.8683e-05
AT1G07400	HSP20-like chaperones superfamily protein; CONTAINS InterPro DOMAIN/s: Heat shock protein Hsp20 (InterPro:IPR002068), HSP20-like chaperone (InterPro:IPR008978); BEST Arabidopsis thaliana protein match is: HSP20-like chaperones superfamily protein (TAIR:AT1G59860.1); Has 7238 Blast hits to 7237 proteins in 1623 species: Archae - 225; Bacteria - 4290; Metazoa - 129; Fungi - 318; Plants - 1626; Viru…	Up	51.2267	342.858	197.042	1.85178	0.332795	5.56434	2.63152e-08	5.43211e-05
