# Supplementary material for: POWERDRESS-mediated histone deacetylation is essential for thermomorphogenesis in Arabidopsis thaliana
Source: PLoS Genet. 2018 Mar 16;14(3):e1007280. doi: 10.1371/journal.pgen.1007280 (PMC5874081; doi:10.1371/journal.pgen.1007280)
Supplement: S5 Table — The GO terms with “response” are given in bold. The GO terms associated with “defense” are highlighted. (XLSX) [file pgen.1007280.s023.xlsx]

## Sheet: UpinPWR.txt
	Table S5: Gene Ontology (GO) terms that are significantly enriched for genes that are upregulated in pwr-2 compared to Col-0 at 27 ºC. The terms with response in them are in bold and defense associated terms are highlighted.
Parameters	AgriGO, TAIR10, Fisher, Yekutieli correction with complete GO as on 8 March 2017
GO_acc	term_type	Term	queryitem	querytotal	bgitem	bgtotal	pvalue	FDR
GO:0042221	P	response to chemical stimulus	205	507	3978	28397	3.8e-47	1.6e-43
GO:0050896	P	response to stimulus	262	507	6292	28397	1.1e-46	2.2e-43
GO:0010033	P	response to organic substance	164	507	2754	28397	1.1e-43	1.5e-40
GO:0006950	P	response to stress	195	507	4089	28397	1.3e-39	1.4e-36
GO:0006354	P	RNA elongation	42	507	133	28397	2.1e-35	1.7e-32
GO:0051707	P	response to other organism	104	507	1421	28397	1.5e-33	1.1e-30
GO:0009607	P	response to biotic stimulus	110	507	1687	28397	2.1e-31	1.3e-28
GO:0009719	P	response to endogenous stimulus	106	507	1615	28397	2e-30	1e-27
GO:0006952	P	defense response	107	507	1653	28397	3e-30	1.4e-27
GO:0009743	P	response to carbohydrate stimulus	75	507	812	28397	6.6e-30	2.7e-27
GO:0009414	P	response to water deprivation	54	507	416	28397	4.6e-28	1.7e-25
GO:0009415	P	response to water	54	507	424	28397	1.1e-27	3.6e-25
GO:0051704	P	multi-organism process	108	507	1820	28397	1.5e-27	4.8e-25
GO:0045087	P	innate immune response	76	507	930	28397	3.8e-27	1.1e-24
GO:0002376	P	immune system process	78	507	984	28397	4.6e-27	1.2e-24
GO:0006955	P	immune response	78	507	984	28397	4.6e-27	1.2e-24
GO:0009753	P	response to jasmonic acid stimulus	55	507	471	28397	1.6e-26	4e-24
GO:0009620	P	response to fungus	56	507	499	28397	3.3e-26	7.6e-24
GO:0015979	P	photosynthesis	51	507	435	28397	1e-24	2.2e-22
GO:0010200	P	response to chitin	50	507	421	28397	1.8e-24	3.7e-22
GO:0019748	P	secondary metabolic process	83	507	1247	28397	4.7e-24	9.3e-22
GO:0050832	P	defense response to fungus	45	507	342	28397	9.6e-24	1.8e-21
GO:0009628	P	response to abiotic stimulus	125	507	2635	28397	1.2e-23	2.2e-21
GO:0009814	P	defense response, incompatible interaction	54	507	536	28397	2.9e-23	5e-21
GO:0009751	P	response to salicylic acid stimulus	49	507	470	28397	9.1e-22	1.5e-19
GO:0071446	P	cellular response to salicylic acid stimulus	43	507	351	28397	1.2e-21	1.9e-19
GO:0019438	P	aromatic compound biosynthetic process	57	507	680	28397	6e-21	9.2e-19
GO:0009863	P	salicylic acid mediated signaling pathway	42	507	349	28397	6.6e-21	9.8e-19
GO:0045088	P	regulation of innate immune response	45	507	415	28397	1.1e-20	1.6e-18
GO:0050776	P	regulation of immune response	45	507	419	28397	1.6e-20	2.1e-18
GO:0002682	P	regulation of immune system process	45	507	419	28397	1.6e-20	2.1e-18
GO:0070887	P	cellular response to chemical stimulus	82	507	1417	28397	3.7e-20	4.8e-18
GO:0031347	P	regulation of defense response	49	507	529	28397	8.9e-20	1.1e-17
GO:0009867	P	jasmonic acid mediated signaling pathway	37	507	282	28397	1.1e-19	1.3e-17
GO:0071395	P	cellular response to jasmonic acid stimulus	37	507	282	28397	1.1e-19	1.3e-17
GO:0009627	P	systemic acquired resistance	45	507	445	28397	1.4e-19	1.6e-17
GO:0080134	P	regulation of response to stress	49	507	544	28397	2.6e-19	2.9e-17
GO:0048583	P	regulation of response to stimulus	54	507	667	28397	2.9e-19	3.2e-17
GO:0007242	P	intracellular signaling cascade	75	507	1252	28397	3e-19	3.2e-17
GO:0051716	P	cellular response to stimulus	108	507	2355	28397	3.2e-19	3.3e-17
GO:0006725	P	cellular aromatic compound metabolic process	67	507	1022	28397	3.9e-19	3.9e-17
GO:0042742	P	defense response to bacterium	42	507	394	28397	4e-19	3.9e-17
GO:0000165	P	MAPKKK cascade	32	507	209	28397	6.2e-19	5.7e-17
GO:0006091	P	generation of precursor metabolites and energy	56	507	730	28397	6e-19	5.7e-17
GO:0023052	P	signaling	108	507	2376	28397	6e-19	5.7e-17
GO:0044283	P	small molecule biosynthetic process	93	507	1865	28397	1e-18	9e-17
GO:0009725	P	response to hormone stimulus	78	507	1375	28397	1e-18	9.2e-17
GO:0009737	P	response to abscisic acid stimulus	51	507	621	28397	1.8e-18	1.5e-16
GO:0048585	P	negative regulation of response to stimulus	39	507	349	28397	1.8e-18	1.5e-16
GO:0007243	P	protein kinase cascade	32	507	223	28397	3.4e-18	2.8e-16
GO:0006575	P	cellular amino acid derivative metabolic process	54	507	714	28397	4.8e-18	3.9e-16
GO:0010363	P	regulation of plant-type hypersensitive response	39	507	371	28397	1.2e-17	9.3e-16
GO:0009617	P	response to bacterium	48	507	577	28397	1.2e-17	9.3e-16
GO:0031348	P	negative regulation of defense response	34	507	273	28397	1.5e-17	1.1e-15
GO:0009723	P	response to ethylene stimulus	38	507	353	28397	1.5e-17	1.2e-15
GO:0043067	P	regulation of programmed cell death	40	507	397	28397	1.7e-17	1.3e-15
GO:0080135	P	regulation of cellular response to stress	39	507	379	28397	2.3e-17	1.7e-15
GO:0071310	P	cellular response to organic substance	71	507	1234	28397	2.3e-17	1.7e-15
GO:0009626	P	plant-type hypersensitive response	40	507	401	28397	2.4e-17	1.7e-15
GO:0034050	P	host programmed cell death induced by symbiont	40	507	402	28397	2.6e-17	1.8e-15
GO:0010941	P	regulation of cell death	40	507	405	28397	3.3e-17	2.2e-15
GO:0012501	P	programmed cell death	42	507	451	28397	3.6e-17	2.4e-15
GO:0008219	P	cell death	44	507	500	28397	4.3e-17	2.7e-15
GO:0016265	P	death	44	507	500	28397	4.3e-17	2.7e-15
GO:0042538	P	hyperosmotic salinity response	27	507	162	28397	5.4e-17	3.4e-15
GO:0071495	P	cellular response to endogenous stimulus	56	507	815	28397	6e-17	3.8e-15
GO:0006612	P	protein targeting to membrane	39	507	392	28397	6.6e-17	4.1e-15
GO:0009605	P	response to external stimulus	64	507	1087	28397	3.7e-16	2.2e-14
GO:0042398	P	cellular amino acid derivative biosynthetic process	44	507	534	28397	4e-16	2.4e-14
GO:0033554	P	cellular response to stress	76	507	1473	28397	4.4e-16	2.6e-14
GO:0009862	P	systemic acquired resistance, salicylic acid mediated signaling pathway	31	507	251	28397	5.1e-16	3e-14
GO:0007165	P	signal transduction	81	507	1670	28397	1.1e-15	6.4e-14
GO:0019684	P	photosynthesis, light reaction	34	507	333	28397	3.4e-15	1.9e-13
GO:0009611	P	response to wounding	34	507	340	28397	5.9e-15	3.3e-13
GO:0009987	P	cellular process	344	507	14419	28397	8.8e-15	4.8e-13
GO:0023060	P	signal transmission	81	507	1767	28397	2.2e-14	1.2e-12
GO:0023046	P	signaling process	81	507	1768	28397	2.2e-14	1.2e-12
GO:0009718	P	anthocyanin biosynthetic process	17	507	63	28397	4e-14	2.1e-12
GO:0009409	P	response to cold	44	507	629	28397	8.9e-14	4.7e-12
GO:0071215	P	cellular response to abscisic acid stimulus	29	507	267	28397	9.1e-14	4.7e-12
GO:0009697	P	salicylic acid biosynthetic process	26	507	209	28397	1e-13	5.3e-12
GO:0009738	P	abscisic acid mediated signaling pathway	28	507	252	28397	1.5e-13	7.5e-12
GO:0009266	P	response to temperature stimulus	55	507	962	28397	1.6e-13	8.1e-12
GO:0006970	P	response to osmotic stress	51	507	842	28397	1.7e-13	8.3e-12
GO:0009696	P	salicylic acid metabolic process	26	507	222	28397	3.7e-13	1.8e-11
GO:0043069	P	negative regulation of programmed cell death	23	507	170	28397	5.8e-13	2.8e-11
GO:0006972	P	hyperosmotic response	27	507	251	28397	8.1e-13	3.9e-11
GO:0060548	P	negative regulation of cell death	23	507	174	28397	9e-13	4.2e-11
GO:0008152	P	metabolic process	323	507	13633	28397	1.3e-12	6.1e-11
GO:0046283	P	anthocyanin metabolic process	17	507	87	28397	3.6e-12	1.7e-10
GO:0010224	P	response to UV-B	18	507	104	28397	5.1e-12	2.3e-10
GO:0009651	P	response to salt stress	46	507	788	28397	9.2e-12	4.1e-10
GO:0009813	P	flavonoid biosynthetic process	24	507	225	28397	1.8e-11	8e-10
GO:0016137	P	glycoside metabolic process	26	507	268	28397	1.8e-11	8e-10
GO:0010310	P	regulation of hydrogen peroxide metabolic process	22	507	187	28397	2.2e-11	9.8e-10
GO:0080010	P	regulation of oxygen and reactive oxygen species metabolic process	22	507	188	28397	2.5e-11	1.1e-09
GO:0009812	P	flavonoid metabolic process	25	507	251	28397	2.7e-11	1.1e-09
GO:0044237	P	cellular metabolic process	280	507	11509	28397	2.7e-11	1.1e-09
GO:0046394	P	carboxylic acid biosynthetic process	55	507	1116	28397	4e-11	1.6e-09
GO:0016053	P	organic acid biosynthetic process	55	507	1116	28397	4e-11	1.6e-09
GO:0009699	P	phenylpropanoid biosynthetic process	28	507	327	28397	4.6e-11	1.9e-09
GO:0006519	P	cellular amino acid and derivative metabolic process	60	507	1324	28397	1.2e-10	4.8e-09
GO:0042434	P	indole derivative metabolic process	19	507	148	28397	1.4e-10	5.4e-09
GO:0042430	P	indole and derivative metabolic process	19	507	148	28397	1.4e-10	5.4e-09
GO:0032787	P	monocarboxylic acid metabolic process	64	507	1481	28397	1.7e-10	6.8e-09
GO:0009698	P	phenylpropanoid metabolic process	30	507	405	28397	2.5e-10	9.6e-09
GO:0016138	P	glycoside biosynthetic process	22	507	215	28397	2.6e-10	1e-08
GO:0042435	P	indole derivative biosynthetic process	18	507	139	28397	3.7e-10	1.4e-08
GO:0044281	P	small molecule metabolic process	126	507	4065	28397	4.1e-10	1.6e-08
GO:0031408	P	oxylipin biosynthetic process	18	507	142	28397	5e-10	1.9e-08
GO:0006790	P	sulfur metabolic process	39	507	683	28397	6.8e-10	2.6e-08
GO:0044249	P	cellular biosynthetic process	202	507	7737	28397	8.2e-10	3e-08
GO:0031407	P	oxylipin metabolic process	19	507	168	28397	9.6e-10	3.5e-08
GO:0009744	P	response to sucrose stimulus	21	507	210	28397	9.8e-10	3.5e-08
GO:0034976	P	response to endoplasmic reticulum stress	27	507	352	28397	9.7e-10	3.5e-08
GO:0009404	P	toxin metabolic process	21	507	211	28397	1.1e-09	3.7e-08
GO:0009407	P	toxin catabolic process	21	507	211	28397	1.1e-09	3.7e-08
GO:0009058	P	biosynthetic process	206	507	7962	28397	1.1e-09	3.7e-08
GO:0034285	P	response to disaccharide stimulus	21	507	213	28397	1.2e-09	4.3e-08
GO:0009695	P	jasmonic acid biosynthetic process	17	507	136	28397	1.9e-09	6.4e-08
GO:0043900	P	regulation of multi-organism process	16	507	118	28397	1.9e-09	6.6e-08
GO:0042180	P	cellular ketone metabolic process	78	507	2123	28397	2.1e-09	7.1e-08
GO:0009694	P	jasmonic acid metabolic process	18	507	160	28397	2.9e-09	9.6e-08
GO:0009595	P	detection of biotic stimulus	15	507	104	28397	2.9e-09	9.7e-08
GO:0016143	P	S-glycoside metabolic process	20	507	205	28397	3.6e-09	1.2e-07
GO:0019757	P	glycosinolate metabolic process	20	507	205	28397	3.6e-09	1.2e-07
GO:0019760	P	glucosinolate metabolic process	20	507	205	28397	3.6e-09	1.2e-07
GO:0043436	P	oxoacid metabolic process	76	507	2103	28397	6.9e-09	2.2e-07
GO:0019752	P	carboxylic acid metabolic process	76	507	2103	28397	6.9e-09	2.2e-07
GO:0006082	P	organic acid metabolic process	76	507	2105	28397	7.2e-09	2.3e-07
GO:0019761	P	glucosinolate biosynthetic process	18	507	172	28397	8.1e-09	2.5e-07
GO:0016144	P	S-glycoside biosynthetic process	18	507	172	28397	8.1e-09	2.5e-07
GO:0019758	P	glycosinolate biosynthetic process	18	507	172	28397	8.1e-09	2.5e-07
GO:0022900	P	electron transport chain	16	507	133	28397	9.1e-09	2.8e-07
GO:0009767	P	photosynthetic electron transport chain	13	507	80	28397	9.2e-09	2.8e-07
GO:0010120	P	camalexin biosynthetic process	7	507	11	28397	1.3e-08	4e-07
GO:0052317	P	camalexin metabolic process	7	507	11	28397	1.3e-08	4e-07
GO:0009411	P	response to UV	21	507	247	28397	1.4e-08	4.2e-07
GO:0006979	P	response to oxidative stress	33	507	582	28397	1.7e-08	5.1e-07
GO:0042431	P	indole metabolic process	7	507	12	28397	2.1e-08	5.9e-07
GO:0052315	P	phytoalexin biosynthetic process	7	507	12	28397	2.1e-08	5.9e-07
GO:0052314	P	phytoalexin metabolic process	7	507	12	28397	2.1e-08	5.9e-07
GO:0009700	P	indole phytoalexin biosynthetic process	7	507	12	28397	2.1e-08	5.9e-07
GO:0046217	P	indole phytoalexin metabolic process	7	507	12	28397	2.1e-08	5.9e-07
GO:0009755	P	hormone-mediated signaling pathway	33	507	600	28397	3.4e-08	9.7e-07
GO:0055114	P	oxidation reduction	55	507	1364	28397	3.6e-08	1e-06
GO:0009625	P	response to insect	12	507	76	28397	4.6e-08	1.3e-06
GO:0006605	P	protein targeting	42	507	906	28397	4.7e-08	1.3e-06
GO:0032870	P	cellular response to hormone stimulus	34	507	641	28397	4.8e-08	1.3e-06
GO:0052542	P	callose deposition during defense response	11	507	62	28397	5.8e-08	1.6e-06
GO:0007154	P	cell communication	37	507	758	28397	9.1e-08	2.5e-06
GO:0001666	P	response to hypoxia	13	507	100	28397	9.9e-08	2.7e-06
GO:0042440	P	pigment metabolic process	24	507	361	28397	1.1e-07	2.9e-06
GO:0042743	P	hydrogen peroxide metabolic process	23	507	335	28397	1.1e-07	3e-06
GO:0002679	P	respiratory burst during defense response	14	507	121	28397	1.2e-07	3.2e-06
GO:0045730	P	respiratory burst	14	507	121	28397	1.2e-07	3.2e-06
GO:0070482	P	response to oxygen levels	13	507	104	28397	1.5e-07	4e-06
GO:0070727	P	cellular macromolecule localization	46	507	1093	28397	1.6e-07	4.2e-06
GO:0048519	P	negative regulation of biological process	50	507	1243	28397	1.7e-07	4.4e-06
GO:0044255	P	cellular lipid metabolic process	54	507	1395	28397	1.7e-07	4.4e-06
GO:0014070	P	response to organic cyclic substance	15	507	148	28397	2.1e-07	5.2e-06
GO:0006800	P	oxygen and reactive oxygen species metabolic process	23	507	347	28397	2e-07	5.2e-06
GO:0051606	P	detection of stimulus	15	507	148	28397	2.1e-07	5.2e-06
GO:0010583	P	response to cyclopentenone	15	507	148	28397	2.1e-07	5.2e-06
GO:0052545	P	callose localization	12	507	93	28397	3.3e-07	8.3e-06
GO:0006633	P	fatty acid biosynthetic process	21	507	303	28397	3.5e-07	8.7e-06
GO:0033037	P	polysaccharide localization	12	507	94	28397	3.7e-07	9.1e-06
GO:0009682	P	induced systemic resistance	7	507	22	28397	5.5e-07	1.3e-05
GO:0051179	P	localization	109	507	3819	28397	5.8e-07	1.4e-05
GO:0019375	P	galactolipid biosynthetic process	12	507	99	28397	6.1e-07	1.5e-05
GO:0045333	P	cellular respiration	14	507	141	28397	6.6e-07	1.6e-05
GO:0019374	P	galactolipid metabolic process	12	507	100	28397	6.7e-07	1.6e-05
GO:0033036	P	macromolecule localization	56	507	1541	28397	7e-07	1.7e-05
GO:0044238	P	primary metabolic process	264	507	11717	28397	7.4e-07	1.8e-05
GO:0008610	P	lipid biosynthetic process	46	507	1159	28397	7.8e-07	1.8e-05
GO:0071456	P	cellular response to hypoxia	7	507	24	28397	9e-07	2.1e-05
GO:0009247	P	glycolipid biosynthetic process	12	507	107	28397	1.3e-06	3e-05
GO:0009684	P	indoleacetic acid biosynthetic process	12	507	108	28397	1.4e-06	3.3e-05
GO:0071453	P	cellular response to oxygen levels	7	507	26	28397	1.4e-06	3.3e-05
GO:0009683	P	indoleacetic acid metabolic process	12	507	109	28397	1.5e-06	3.6e-05
GO:0006886	P	intracellular protein transport	42	507	1044	28397	1.7e-06	3.9e-05
GO:0046148	P	pigment biosynthetic process	19	507	282	28397	1.9e-06	4.2e-05
GO:0009733	P	response to auxin stimulus	24	507	431	28397	2.1e-06	4.7e-05
GO:0023034	P	intracellular signaling pathway	24	507	433	28397	2.3e-06	5.1e-05
GO:0034613	P	cellular protein localization	42	507	1059	28397	2.4e-06	5.4e-05
GO:0006629	P	lipid metabolic process	60	507	1772	28397	2.5e-06	5.6e-05
GO:0006810	P	transport	101	507	3577	28397	2.7e-06	6e-05
GO:0006664	P	glycolipid metabolic process	12	507	116	28397	2.8e-06	6.1e-05
GO:0030968	P	endoplasmic reticulum unfolded protein response	15	507	185	28397	2.8e-06	6.1e-05
GO:0031669	P	cellular response to nutrient levels	21	507	350	28397	3.1e-06	6.6e-05
GO:0042402	P	cellular biogenic amine catabolic process	12	507	117	28397	3e-06	6.6e-05
GO:0034620	P	cellular response to unfolded protein	15	507	187	28397	3.2e-06	6.8e-05
GO:0006986	P	response to unfolded protein	15	507	187	28397	3.2e-06	6.8e-05
GO:0009310	P	amine catabolic process	16	507	214	28397	3.5e-06	7.5e-05
GO:0006569	P	tryptophan catabolic process	10	507	79	28397	3.7e-06	7.8e-05
GO:0046218	P	indolalkylamine catabolic process	10	507	79	28397	3.7e-06	7.8e-05
GO:0031668	P	cellular response to extracellular stimulus	22	507	388	28397	4.2e-06	8.9e-05
GO:0071496	P	cellular response to external stimulus	22	507	389	28397	4.4e-06	9.2e-05
GO:0042436	P	indole derivative catabolic process	10	507	81	28397	4.6e-06	9.4e-05
GO:0006984	P	ER-nuclear signaling pathway	15	507	193	28397	4.5e-06	9.4e-05
GO:0016036	P	cellular response to phosphate starvation	14	507	169	28397	4.8e-06	9.8e-05
GO:0071445	P	cellular response to protein stimulus	15	507	194	28397	4.8e-06	9.9e-05
GO:0023033	P	signaling pathway	26	507	519	28397	5e-06	0.0001
GO:0006568	P	tryptophan metabolic process	11	507	102	28397	5e-06	0.0001
GO:0006586	P	indolalkylamine metabolic process	11	507	102	28397	5e-06	0.0001
GO:0015980	P	energy derivation by oxidation of organic compounds	14	507	170	28397	5.1e-06	0.0001
GO:0006631	P	fatty acid metabolic process	28	507	587	28397	5.2e-06	0.0001
GO:0009851	P	auxin biosynthetic process	12	507	124	28397	5.3e-06	0.00011
GO:0071216	P	cellular response to biotic stimulus	15	507	197	28397	5.7e-06	0.00011
GO:0009267	P	cellular response to starvation	20	507	336	28397	5.9e-06	0.00012
GO:0031667	P	response to nutrient levels	21	507	367	28397	6.1e-06	0.00012
GO:0010286	P	heat acclimation	10	507	84	28397	6.1e-06	0.00012
GO:0051234	P	establishment of localization	101	507	3652	28397	6.5e-06	0.00013
GO:0016051	P	carbohydrate biosynthetic process	41	507	1070	28397	7.2e-06	0.00014
GO:0042594	P	response to starvation	20	507	344	28397	8.1e-06	0.00016
GO:0009074	P	aromatic amino acid family catabolic process	10	507	87	28397	8.1e-06	0.00016
GO:0005982	P	starch metabolic process	16	507	230	28397	8.2e-06	0.00016
GO:0009063	P	cellular amino acid catabolic process	14	507	178	28397	8.3e-06	0.00016
GO:0009991	P	response to extracellular stimulus	22	507	406	28397	8.4e-06	0.00016
GO:0006576	P	cellular biogenic amine metabolic process	14	507	182	28397	1e-05	0.0002
GO:0048523	P	negative regulation of cellular process	33	507	789	28397	1.1e-05	0.0002
GO:0034637	P	cellular carbohydrate biosynthetic process	37	507	941	28397	1.2e-05	0.00022
GO:0044272	P	sulfur compound biosynthetic process	24	507	486	28397	1.4e-05	0.00027
GO:0019252	P	starch biosynthetic process	14	507	191	28397	1.7e-05	0.00032
GO:0042219	P	cellular amino acid derivative catabolic process	12	507	142	28397	1.9e-05	0.00034
GO:0009850	P	auxin metabolic process	12	507	142	28397	1.9e-05	0.00034
GO:0045184	P	establishment of protein localization	42	507	1160	28397	2e-05	0.00037
GO:0015031	P	protein transport	42	507	1160	28397	2e-05	0.00037
GO:0034754	P	cellular hormone metabolic process	13	507	171	28397	2.4e-05	0.00044
GO:0055085	P	transmembrane transport	28	507	648	28397	2.9e-05	0.00052
GO:0046467	P	membrane lipid biosynthetic process	12	507	149	28397	2.9e-05	0.00052
GO:0046483	P	heterocycle metabolic process	38	507	1023	28397	3e-05	0.00053
GO:0010207	P	photosystem II assembly	13	507	177	28397	3.4e-05	0.0006
GO:0009416	P	response to light stimulus	42	507	1188	28397	3.4e-05	0.00061
GO:0005975	P	carbohydrate metabolic process	67	507	2249	28397	3.6e-05	0.00064
GO:0009624	P	response to nematode	9	507	84	28397	3.8e-05	0.00067
GO:0006351	P	transcription, DNA-dependent	75	507	2618	28397	4.2e-05	0.00073
GO:0006350	P	transcription	75	507	2620	28397	4.3e-05	0.00075
GO:0009693	P	ethylene biosynthetic process	11	507	131	28397	4.4e-05	0.00075
GO:0032774	P	RNA biosynthetic process	75	507	2621	28397	4.4e-05	0.00075
GO:0009692	P	ethylene metabolic process	11	507	131	28397	4.4e-05	0.00075
GO:0019439	P	aromatic compound catabolic process	10	507	108	28397	4.5e-05	0.00078
GO:0043449	P	cellular alkene metabolic process	11	507	133	28397	5e-05	0.00085
GO:0043450	P	alkene biosynthetic process	11	507	133	28397	5e-05	0.00085
GO:0008104	P	protein localization	42	507	1216	28397	5.7e-05	0.00096
GO:0002252	P	immune effector process	16	507	273	28397	5.9e-05	0.00099
GO:0065007	P	biological regulation	149	507	6222	28397	5.9e-05	0.00099
GO:0006119	P	oxidative phosphorylation	8	507	72	28397	8.1e-05	0.0014
GO:0051789	P	response to protein stimulus	19	507	376	28397	8.3e-05	0.0014
GO:0044247	P	cellular polysaccharide catabolic process	5	507	22	28397	9.6e-05	0.0016
GO:0007568	P	aging	11	507	145	28397	0.0001	0.0017
GO:0000272	P	polysaccharide catabolic process	7	507	56	28397	0.00012	0.0019
GO:0009314	P	response to radiation	42	507	1263	28397	0.00013	0.0021
GO:0006643	P	membrane lipid metabolic process	12	507	179	28397	0.00015	0.0025
GO:0044042	P	glucan metabolic process	20	507	432	28397	0.00017	0.0027
GO:0034641	P	cellular nitrogen compound metabolic process	44	507	1373	28397	0.00019	0.0031
GO:0002684	P	positive regulation of immune system process	6	507	43	28397	0.00021	0.0033
GO:0045089	P	positive regulation of innate immune response	6	507	43	28397	0.00021	0.0033
GO:0050778	P	positive regulation of immune response	6	507	43	28397	0.00021	0.0033
GO:0048584	P	positive regulation of response to stimulus	8	507	84	28397	0.00022	0.0035
GO:0046907	P	intracellular transport	45	507	1423	28397	0.00022	0.0035
GO:0009250	P	glucan biosynthetic process	16	507	313	28397	0.00026	0.0041
GO:0005984	P	disaccharide metabolic process	13	507	221	28397	0.00028	0.0043
GO:0051641	P	cellular localization	49	507	1613	28397	0.00028	0.0044
GO:0042631	P	cellular response to water deprivation	7	507	67	28397	0.00032	0.005
GO:0031349	P	positive regulation of defense response	6	507	47	28397	0.00032	0.005
GO:0010817	P	regulation of hormone levels	20	507	456	28397	0.00033	0.0051
GO:0006073	P	cellular glucan metabolic process	18	507	388	28397	0.00034	0.0053
GO:0009631	P	cold acclimation	5	507	31	28397	0.00039	0.006
GO:0010150	P	leaf senescence	7	507	70	28397	0.00041	0.0063
GO:0044262	P	cellular carbohydrate metabolic process	52	507	1778	28397	0.00044	0.0067
GO:0046700	P	heterocycle catabolic process	14	507	266	28397	0.00047	0.0072
GO:0006754	P	ATP biosynthetic process	7	507	72	28397	0.00048	0.0072
GO:0050794	P	regulation of cellular process	111	507	4595	28397	0.00053	0.008
GO:0009408	P	response to heat	15	507	303	28397	0.00055	0.0083
GO:0002218	P	activation of innate immune response	5	507	34	28397	0.00057	0.0086
GO:0002253	P	activation of immune response	5	507	34	28397	0.00057	0.0086
GO:0044106	P	cellular amine metabolic process	32	507	947	28397	0.00062	0.0093
GO:0009311	P	oligosaccharide metabolic process	13	507	244	28397	0.00067	0.0099
GO:0009308	P	amine metabolic process	34	507	1034	28397	0.00067	0.0099
GO:0009072	P	aromatic amino acid family metabolic process	13	507	245	28397	0.00069	0.01
GO:0009145	P	purine nucleoside triphosphate biosynthetic process	7	507	78	28397	0.00074	0.011
GO:0009206	P	purine ribonucleoside triphosphate biosynthetic process	7	507	78	28397	0.00074	0.011
GO:0009201	P	ribonucleoside triphosphate biosynthetic process	7	507	78	28397	0.00074	0.011
GO:0048878	P	chemical homeostasis	14	507	281	28397	0.00079	0.011
GO:0009142	P	nucleoside triphosphate biosynthetic process	7	507	79	28397	0.0008	0.012
GO:0006520	P	cellular amino acid metabolic process	30	507	882	28397	0.00083	0.012
GO:0015986	P	ATP synthesis coupled proton transport	5	507	38	28397	0.0009	0.013
GO:0015985	P	energy coupled proton transport, down electrochemical gradient	5	507	38	28397	0.0009	0.013
GO:0010193	P	response to ozone	5	507	39	28397	0.001	0.014
GO:0009269	P	response to desiccation	5	507	39	28397	0.001	0.014
GO:0006461	P	protein complex assembly	22	507	577	28397	0.001	0.014
GO:0070271	P	protein complex biogenesis	22	507	577	28397	0.001	0.014
GO:0050789	P	regulation of biological process	122	507	5235	28397	0.001	0.014
GO:0043623	P	cellular protein complex assembly	20	507	504	28397	0.0011	0.015
GO:0051649	P	establishment of localization in cell	45	507	1554	28397	0.0013	0.018
GO:0046395	P	carboxylic acid catabolic process	17	507	402	28397	0.0013	0.018
GO:0016054	P	organic acid catabolic process	17	507	402	28397	0.0013	0.018
GO:0009056	P	catabolic process	58	507	2182	28397	0.0019	0.026
GO:0042446	P	hormone biosynthetic process	13	507	277	28397	0.002	0.027
GO:0052543	P	callose deposition in cell wall	5	507	47	28397	0.0021	0.03
GO:0009152	P	purine ribonucleotide biosynthetic process	7	507	95	28397	0.0022	0.03
GO:0010260	P	organ senescence	7	507	96	28397	0.0023	0.031
GO:0010149	P	senescence	7	507	96	28397	0.0023	0.031
GO:0022904	P	respiratory electron transport chain	5	507	48	28397	0.0023	0.032
GO:0052386	P	cell wall thickening	5	507	48	28397	0.0023	0.032
GO:0000096	P	sulfur amino acid metabolic process	18	507	465	28397	0.0024	0.033
GO:0006873	P	cellular ion homeostasis	10	507	185	28397	0.0025	0.033
GO:0006164	P	purine nucleotide biosynthetic process	8	507	125	28397	0.0025	0.033
GO:0055082	P	cellular chemical homeostasis	10	507	186	28397	0.0025	0.034
GO:0006855	P	multidrug transport	6	507	73	28397	0.0027	0.035
GO:0042445	P	hormone metabolic process	14	507	324	28397	0.0028	0.037
GO:0005976	P	polysaccharide metabolic process	24	507	712	28397	0.003	0.039
GO:0015893	P	drug transport	6	507	75	28397	0.003	0.04
GO:0042493	P	response to drug	6	507	76	28397	0.0032	0.042
GO:0006807	P	nitrogen compound metabolic process	127	507	5675	28397	0.0034	0.045
GO:0009787	P	regulation of abscisic acid mediated signaling pathway	5	507	53	28397	0.0035	0.045
GO:0034220	P	ion transmembrane transport	8	507	133	28397	0.0035	0.046
GO:0044264	P	cellular polysaccharide metabolic process	21	507	601	28397	0.0036	0.046
GO:0045229	P	external encapsulating structure organization	6	507	78	28397	0.0036	0.047
